# Supplementary material for: Insights into ThB40: Stability, Electronic Structure, and Interaction
Source: MDPI journal article supplement (doi:10.3390/molecules29061222), 2024-03-08
Supplement: s1 [file s1]

## Supporting Information

# Insights into ThB<sub>40</sub>: Stability, Electronic Structure, and Interaction

Yutian Li <sup>1,\*</sup>, Yingying Wang <sup>1</sup>, Zhanrong Zhou <sup>1</sup>, Yang Gao <sup>1</sup>, Yiming Chen <sup>1</sup>, Guoqing Zhang <sup>1</sup> and Chao Ma <sup>2</sup>

<sup>1</sup> Xi'an Research Institute of High Technology, Xi'an 710025, China;  
gaoyang\_nudt@126.com (Y.G.)

<sup>2</sup> Foundation Department, Engineering University of PAP, Xi'an  
710086, China

\* Correspondence: lyt13593587864@stu.xjtu.edu.cn

Contents:

|                                                                                                                                          |    |
|------------------------------------------------------------------------------------------------------------------------------------------|----|
| Figure S1 Potential isomers of ThB <sub>40</sub> based on $D_{2d}$ -B <sub>40</sub> and $C_s$ -B <sub>40</sub> isomers.....              | S3 |
| Table S1 Relative energy of $D_{2d}$ -B <sub>40</sub> and $C_s$ -B <sub>40</sub> in different spin multiplicities.....                   | S4 |
| Table S2 Relative energy of Th@ $D_{2d}$ -B <sub>40</sub> and Th@ $C_s$ -B <sub>40</sub> at different functionals.....                   | S4 |
| Table S3 Relative energy of Th@ $D_{2d}$ -B <sub>40</sub> in different spin multiplicities.....                                          | S4 |
| Figure S2 Geometry of Th@ $D_{2d}$ -B <sub>40</sub> with atom labels.....                                                                | S5 |
| Table S4 Parameters of bond critical points between B and Th atoms.....                                                                  | S5 |
| Figure S3 Maps of feature displacement vectors in Th@ $D_{2d}$ -B <sub>40</sub> .....                                                    | S6 |
| Coordinates of $D_{2d}$ -B <sub>40</sub> , $C_s$ -B <sub>40</sub> , Th@ $D_{2d}$ -B <sub>40</sub> , and Th@ $C_s$ -B <sub>40</sub> ..... | S7 |

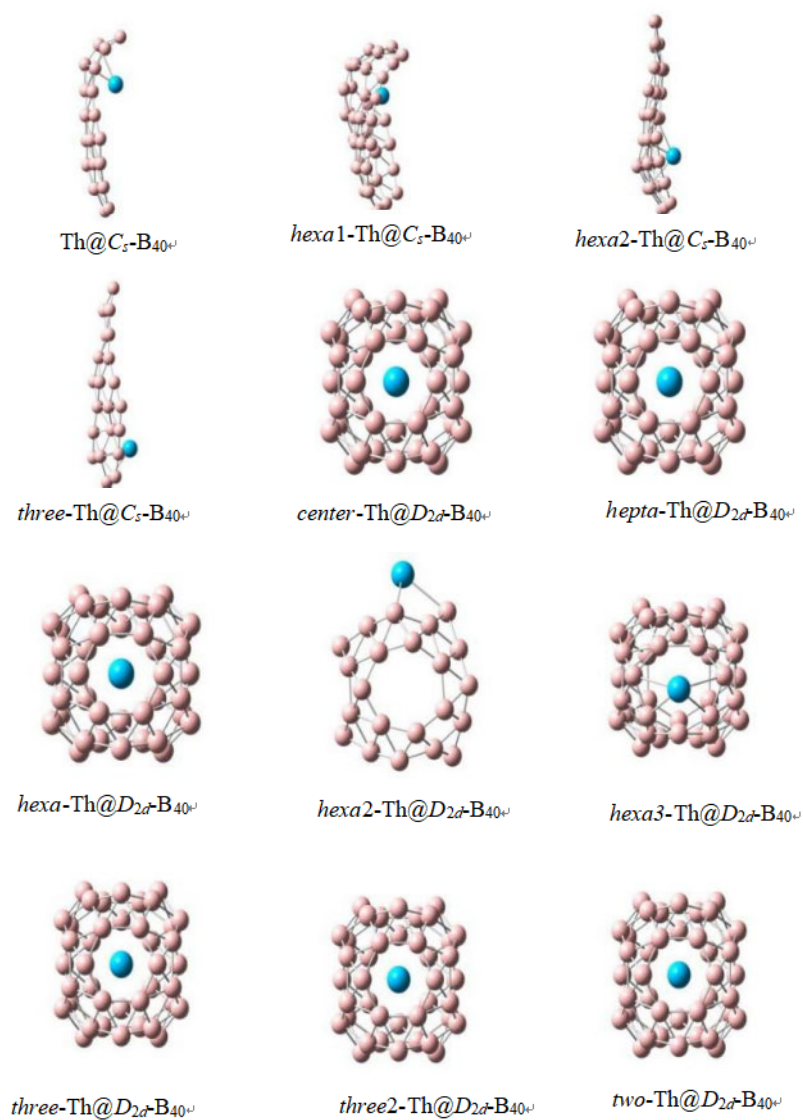

**Figure S1** Potential isomers of ThB<sub>40</sub> based on D<sub>2d</sub>-B<sub>40</sub> and C<sub>5</sub>-B<sub>40</sub> isomers optimized on the TPSSH/6-31G\*~SDD. The Th atoms are colored in blue and B atoms are colored in pink.

**Table S1** Relative energy of  $D_{2d}$ -B<sub>40</sub> and  $C_s$ -B<sub>40</sub> in different spin multiplicities optimized on the the TPSSH/6-31G\* theoretical level.

| Isomers                   | Singlet/a.u. | Triplet/a.u. | $\Delta E/\text{kcal}\cdot\text{mol}^{-1}$ |
|---------------------------|--------------|--------------|--------------------------------------------|
| $D_{2d}$ -B <sub>40</sub> | -994.035351  | -993.970392  | 40.8                                       |
| $C_s$ -B <sub>40</sub>    | -994.011059  | -993.998578  | 7.8                                        |

**Table S2** Relative energy ( $\text{kcal}\cdot\text{mol}^{-1}$ ) of Th@ $D_{2d}$ -B<sub>40</sub> and Th@ $C_s$ -B<sub>40</sub> at different functionals with 6-31G\*~SDD basis set.

| Isomers                       | B3LYP | BP86 | PBE0 | HSE06 |
|-------------------------------|-------|------|------|-------|
| Th@ $D_{2d}$ -B <sub>40</sub> | 0.0   | 0.0  | 0.0  | 0.0   |
| Th@ $C_s$ -B <sub>40</sub>    | 29.2  | 60.5 | 65.0 | 61.3  |

**Table S3** Relative energy ( $\text{kcal}\cdot\text{mol}^{-1}$ ) of Th@ $D_{2d}$ -B<sub>40</sub> in different spin multiplicities optimized on the different functionals with 6-31G\*~SDD basis set.

| Isomers | B3LYP | BP86 | PBE0 | HSE06 |
|---------|-------|------|------|-------|
| Singlet | 0.0   | 0.0  | 0.0  | 0.0   |
| Triplet | 1.7   | 1.8  | 1.0  | 1.0   |

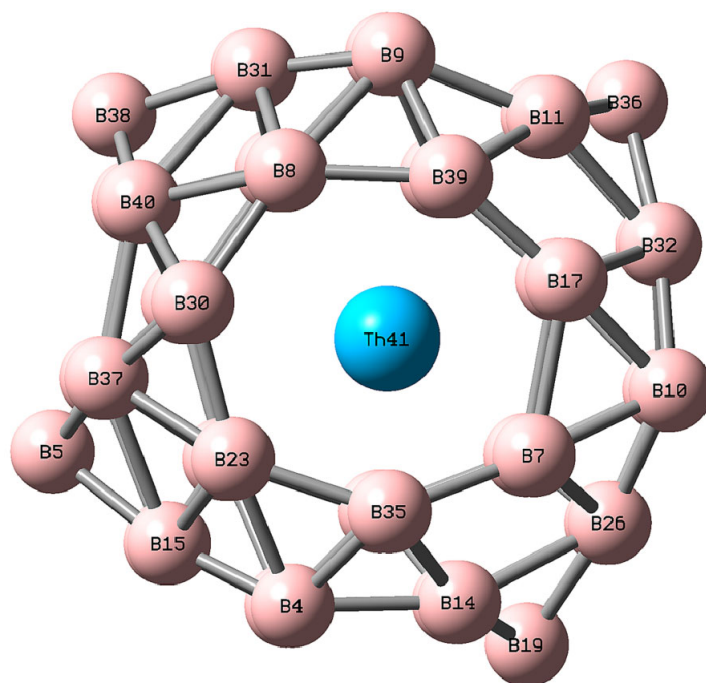

**Figure S2** Geometry of Th@ $D_{2d}$ -B<sub>40</sub> with atom labels.

**Table S4** Parameters of bond critical points between B and Th atoms.

|        | $P_{BCP}$ | $\nabla^2 \rho_{BCP}$ | $G_{BCP}/\rho_{BCP}$ | $H_{BCP}/\rho_{BCP}$ | $ V_{BCP} /\rho_{BCP}$ |
|--------|-----------|-----------------------|----------------------|----------------------|------------------------|
| Th-B7  | 0.033     | 0.055                 | 0.566                | -0.147               | 0.713                  |
| Th-B8  | 0.025     | 0.052                 | 0.602                | -0.090               | 0.692                  |
| Th-B15 | 0.026     | 0.044                 | 0.520                | -0.094               | 0.614                  |
| Th-B17 | 0.033     | 0.055                 | 0.566                | -0.147               | 0.713                  |
| Th-B32 | 0.031     | 0.054                 | 0.560                | -0.120               | 0.680                  |

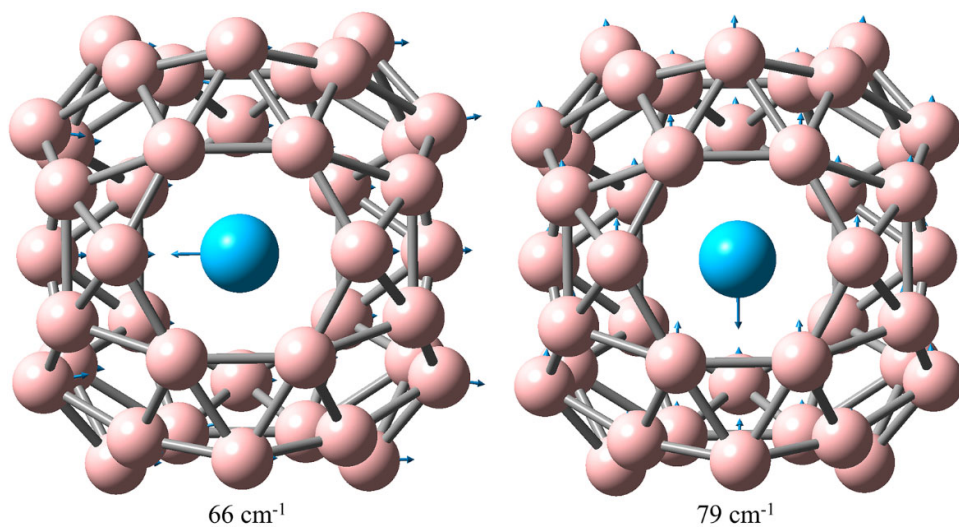

**Figure S3** Maps of feature displacement vectors in Th@D<sub>2d</sub>-B<sub>40</sub> simulated on the TPSSh/6-31G\*~SDD. The Th atoms are colored in blue and B atoms are colored in pink. The vectors are marked by blue arrows.

Coordinates of  $D_{2d}$ -B<sub>40</sub>,  $C_s$ -B<sub>40</sub>, Th@ $D_{2d}$ -B<sub>40</sub>, and Th $C_s$ -B<sub>40</sub>

**$D_{2d}$ -B<sub>40</sub>**

|   |             |             |             |
|---|-------------|-------------|-------------|
| B | 1.75260100  | 2.74276900  | -0.38394100 |
| B | 1.69437100  | 0.00000000  | 2.87638700  |
| B | 1.39005000  | 2.37032000  | 1.20490500  |
| B | -1.75260500 | -2.74277100 | -0.38394100 |
| B | 0.00000100  | -1.69437400 | -2.87638600 |
| B | 2.65161400  | 0.00000100  | -1.99487700 |
| B | -2.37185900 | -0.87949400 | 1.68046200  |
| B | -2.37031700 | 1.39004900  | -1.20490700 |
| B | -1.75260400 | 2.74277100  | -0.38394500 |
| B | -1.69437000 | 0.00000100  | 2.87638600  |
| B | -1.39004900 | 2.37031900  | 1.20490100  |
| B | 2.74277000  | -1.75259000 | 0.38394200  |
| B | 1.39005400  | -2.37031900 | 1.20490800  |
| B | -1.39005100 | -2.37031900 | 1.20490400  |
| B | -0.87948800 | -2.37184400 | -1.68044200 |
| B | 0.87948800  | 2.37184400  | -1.68044900 |
| B | -2.37185600 | 0.87949500  | 1.68045800  |
| B | 0.87949800  | -2.37185700 | -1.68046100 |
| B | 0.00000000  | -2.65161400 | 1.99486400  |
| B | 2.74277000  | 1.75259100  | 0.38394300  |
| B | 2.37185800  | 0.87949500  | 1.68046200  |
| B | 2.37185100  | -0.87949600 | 1.68045900  |
| B | -2.37032000 | -1.39004900 | -1.20490400 |
| B | 2.37031500  | 1.39004900  | -1.20490400 |
| B | 2.37032400  | -1.39004800 | -1.20490700 |
| B | -0.88977100 | -1.39150500 | 2.54058300  |
| B | 0.88976900  | -1.39150600 | 2.54058900  |
| B | 1.75259700  | -2.74276600 | -0.38394200 |
| B | 1.39150100  | -0.88976700 | -2.54058100 |
| B | -2.65161100 | 0.00000000  | -1.99487600 |
| B | -0.87949000 | 2.37184500  | -1.68045300 |
| B | -0.88977000 | 1.39150600  | 2.54058200  |

**$C_s$ -B<sub>40</sub>**

|   |             |             |            |
|---|-------------|-------------|------------|
| B | -0.38248100 | 2.17586700  | 1.71409600 |
| B | 0.09764200  | 2.15632900  | 3.36305000 |
| B | 0.23227700  | 0.73390000  | 4.19430100 |
| B | -0.23130500 | -0.71027900 | 3.33041300 |
| B | -0.69718300 | -0.70405000 | 1.65693800 |
| B | -0.75186600 | 0.74848000  | 0.82571100 |

|   |             |             |             |
|---|-------------|-------------|-------------|
| B | -0.67252300 | -2.16161100 | 0.82965500  |
| B | 0.36686500  | -2.11286500 | 4.12071900  |
| B | 0.19624400  | 3.46064000  | 0.84034600  |
| B | -0.29084600 | -2.12673000 | 2.47346200  |
| B | 0.22324500  | 3.54168300  | 2.54492300  |
| B | 0.50418700  | -0.68845900 | 4.81932600  |
| B | 0.41668700  | -3.55737000 | 3.28810400  |
| B | -0.13570900 | -3.57567800 | 1.65830800  |
| B | 0.42471500  | -4.98658300 | 0.82813100  |
| B | -0.69717300 | -0.70404800 | -1.65693600 |
| B | -0.29084100 | -2.12673000 | -2.47345600 |
| B | -0.13578300 | -3.57569400 | -1.65831400 |
| B | 0.42470900  | -4.98657900 | -0.82814100 |
| B | 0.65049000  | -4.84008600 | -2.39369700 |
| B | 0.41651300  | -3.55742700 | -3.28814800 |
| B | 0.36698800  | -2.11285500 | -4.12066700 |
| B | -0.23126800 | -0.71028100 | -3.33040500 |
| B | 0.50430500  | -0.68845200 | -4.81927900 |
| B | 0.09763800  | 2.15632800  | -3.36305000 |
| B | 0.23224800  | 0.73390800  | -4.19432000 |
| B | -0.38247000 | 2.17586300  | -1.71409300 |
| B | 0.22327200  | 3.54167600  | -2.54491700 |
| B | 0.19625000  | 3.46063900  | -0.84034300 |
| B | -0.47971100 | 0.76066200  | -2.49335000 |
| B | -0.47971200 | 0.76066300  | 2.49334800  |
| B | -0.30456500 | -3.59595800 | 0.00000100  |
| B | -0.75187000 | 0.74847900  | -0.82571200 |
| B | 0.65068900  | -4.84002100 | 2.39365100  |
| B | 0.26565800  | 4.96766000  | 1.71314800  |
| B | -0.09146000 | 4.89717300  | -0.00000100 |
| B | 0.26567300  | 4.96765700  | -1.71314800 |
| B | 0.46150700  | 6.26788100  | -0.78390100 |
| B | 0.46150500  | 6.26788100  | 0.78390000  |
| B | -0.67253700 | -2.16161300 | -0.82965400 |

**Th@D<sub>2d</sub>-B<sub>40</sub>**

|   |             |             |             |
|---|-------------|-------------|-------------|
| B | 1.66177800  | 2.77627300  | -0.36578500 |
| B | 1.60870000  | 0.00074000  | 2.93216200  |
| B | 1.36858700  | 2.44459100  | 1.25574500  |
| B | -1.70480900 | -2.77450100 | -0.36486800 |
| B | -0.02229600 | -1.69473500 | -2.94504400 |
| B | 2.53853100  | 0.00048700  | -1.89295200 |
| B | -2.32762700 | -0.88028600 | 1.70746400  |



|    |             |             |             |
|----|-------------|-------------|-------------|
| B  | -2.34809700 | 1.45357400  | -1.21866200 |
| B  | -1.70464800 | 2.77612700  | -0.36518000 |
| B  | -1.65362700 | 0.00093500  | 2.93325400  |
| B  | -1.41344200 | 2.44513100  | 1.25691500  |
| B  | 2.61450500  | -1.68626900 | 0.39450300  |
| B  | 1.36836900  | -2.44327700 | 1.25601500  |
| B  | -1.41389000 | -2.44331700 | 1.25726900  |
| B  | -0.87062300 | -2.38460200 | -1.66639800 |
| B  | 0.82696500  | 2.38565100  | -1.66717000 |
| B  | -2.32761600 | 0.88183700  | 1.70725800  |
| B  | 0.82674900  | -2.38451300 | -1.66693900 |
| B  | -0.02241100 | -2.73137900 | 2.01704600  |
| B  | 2.61461700  | 1.68737900  | 0.39427400  |
| B  | 2.28390000  | 0.88166100  | 1.70696300  |
| B  | 2.28395600  | -0.88041700 | 1.70717000  |
| B  | -2.34830700 | -1.45209500 | -1.21857600 |
| B  | 2.30436400  | 1.45348800  | -1.21898600 |
| B  | 2.30431800  | -1.45240200 | -1.21880000 |
| B  | -0.87584600 | -1.39955900 | 2.58826500  |
| B  | 0.83207100  | -1.40068300 | 2.58793100  |
| B  | 1.66151000  | -2.77501800 | -0.36551200 |
| B  | 1.33017300  | -0.88573900 | -2.57784600 |
| B  | -2.58256300 | 0.00073200  | -1.89309300 |
| B  | -0.87039000 | 2.38592100  | -1.66662200 |
| B  | -0.87571700 | 1.40126100  | 2.58793800  |
| B  | 0.83225100  | 1.40224900  | 2.58785800  |
| B  | 1.33020800  | 0.88670900  | -2.57791500 |
| B  | -2.65854800 | -1.68591700 | 0.39463300  |
| B  | -0.02210100 | 2.73297800  | 2.01693200  |
| B  | -1.37481100 | -0.88598700 | -2.57796700 |
| B  | -0.02214600 | 1.69587700  | -2.94521400 |
| B  | -2.65831800 | 1.68764400  | 0.39451400  |
| B  | -1.37471300 | 0.88724400  | -2.57805200 |
| Th | -0.02260900 | 0.00062100  | 0.11119300  |

**ThC<sub>5</sub>-B<sub>40</sub>**

|   |             |             |            |
|---|-------------|-------------|------------|
| B | -0.33628900 | 1.90723400  | 1.62408600 |
| B | 0.41432400  | 1.71381300  | 3.20409900 |
| B | 0.11321800  | 0.43842300  | 4.17044400 |
| B | -0.57326900 | -0.92232900 | 3.32651700 |
| B | -1.03296100 | -0.86951500 | 1.67471600 |
| B | -1.09236600 | 0.59868700  | 0.85839700 |
| B | -0.94851500 | -2.27884600 | 0.80754700 |

|    |             |             |             |
|----|-------------|-------------|-------------|
| B  | -0.23068800 | -2.38789300 | 4.16082100  |
| B  | -0.26419100 | 3.46578600  | 0.96415400  |
| B  | -0.84756900 | -2.34710400 | 2.50525600  |
| B  | 0.86640400  | 2.95686700  | 2.28118800  |
| B  | 0.08835900  | -0.98014200 | 4.86169500  |
| B  | -0.08803900 | -3.76445500 | 3.29375900  |
| B  | -0.38289300 | -3.68232800 | 1.57662000  |
| B  | 0.56248100  | -4.85929400 | 0.76493200  |
| B  | -1.13940100 | -0.60270300 | -1.57730400 |
| B  | 0.37872500  | -1.41082700 | -1.93871100 |
| B  | 0.44108600  | -3.08528500 | -1.55196100 |
| B  | 1.11014700  | -4.46101600 | -0.74076100 |
| B  | 1.87043500  | -3.84426200 | -1.96264800 |
| B  | 1.63423500  | -2.44915000 | -2.67228100 |
| B  | 1.37349600  | -0.95924900 | -3.26476600 |
| B  | -0.21103200 | -0.20859600 | -2.98534900 |
| B  | 1.04015300  | 0.45662000  | -3.90519900 |
| B  | -1.27378800 | 2.38971100  | -3.04070400 |
| B  | -0.17541300 | 1.42536400  | -3.69626000 |
| B  | -1.80177700 | 2.26562700  | -1.40221900 |
| B  | -1.33600400 | 3.70598100  | -2.12042600 |
| B  | -1.01145000 | 3.73789500  | -0.44772200 |
| B  | -1.44470700 | 0.86120700  | -2.34460600 |
| B  | -0.66873100 | 0.56399800  | 2.52219800  |
| B  | -0.25217600 | -3.52898600 | -0.07908800 |
| B  | -1.70300100 | 0.79196900  | -0.65795100 |
| B  | 0.44397200  | -4.91057400 | 2.34506500  |
| B  | 1.59947200  | 3.78431400  | 1.13120400  |
| B  | 0.57271900  | 4.43734000  | -0.15247400 |
| B  | -0.05719100 | 4.58917500  | -1.73759500 |
| B  | 1.51361200  | 4.74446300  | -1.51349000 |
| B  | 2.26308000  | 4.28375600  | -0.23126100 |
| B  | -0.76784300 | -2.07319400 | -0.84529000 |
| Th | 0.81486900  | 1.87567200  | -1.07554100 |
